# Supplementary material for: Bisphenol A Induces Gene Expression Changes and Proliferative Effects through GPER in Breast Cancer Cells and Cancer-Associated Fibroblasts
Source: PubMed Central journal article supplement (PMC3440081; doi:10.1289/ehp.1104526), 2012-05-02
Supplement: ehp.1104526.s001.pdf [file ehp.1104526.s001.pdf]

## **Supplemental Material**

### **Bisphenol A Induces Gene Expression Changes and Proliferative Effects through GPER in Breast Cancer Cells and Cancer-Associated Fibroblasts.**

Marco Pupo<sup>1</sup>, Assunta Pisano<sup>1</sup>, Rosamaria Lappano<sup>1</sup>, Maria Francesca Santolla<sup>1</sup>, Ernestina Marianna De Francesco<sup>1</sup>, Sergio Abonante<sup>2</sup>, Camillo Rosano<sup>3</sup>, Marcello Maggiolini<sup>1</sup>

<sup>1</sup>Department of Pharmaco-Biology University of Calabria, Rende, Italy. <sup>2</sup>Regional Hospital, Cosenza, Italy. <sup>3</sup>Department of Bioinformatics and Structural proteomics, National Institute for Cancer Research, Genova, Italy.

## Table of Contents

**Supplemental Material, Table 1 .....PAGE 3**

**Supplemental Material, Figure 1 .....PAGE 4**

**Supplemental Material, Table S1: Sequences of primers used**

| <b>Gene</b>  | <b>Primer Fw</b>            | <b>Primer Rv</b>            |
|--------------|-----------------------------|-----------------------------|
| <i>c-FOS</i> | 5'-CGAGCCCTTTGATGACTTCCT-3' | 5'-GGAGCGGGCTGTCTCAGA-3'    |
| <i>CTGF</i>  | 5'-ACCTGTGGGATGGGCATCT-3'   | 5'-CAGGCGGCTCTGCTTCTCTA-3'  |
| <i>EGR-1</i> | 5'-GCCTGCGACATCTGTGGAA-3'   | 5'-CGCAAGTGGATCTTGGTATGC-3' |
| <i>18S</i>   | 5'-GCGTCCCCCAACTTCTTA-3'    | 5'-GGGCATCACAGACCTGTTATT-3' |

**Supplemental Material, Figure S1**

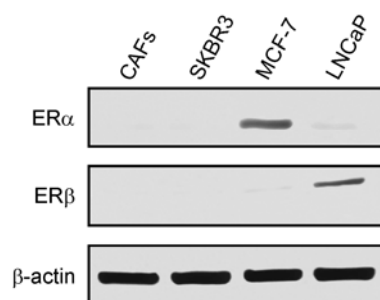

**CAF<sub>s</sub> and SKBR3 cells are ER $\alpha$  and ER $\beta$  negative.** Western blot analyses of ER $\alpha$  and ER $\beta$  protein expression in CAF<sub>s</sub>, SKBR3 and MCF-7 breast cancer cells and LNCaP prostate cancer cells.  $\beta$ -actin antibody was used as a loading control.
